# Supplementary material
Source: MDPI journal article supplement (https://www.mdpi.com/1999-4907/12/9/1149)
Supplement: s1 [file s1]

# Supplementary material

## Annex 1

### EVIDENCE SOURCES SUGGESTED BY STAKEHOLDERS

|                                                                                                                                                             |                                             |
|-------------------------------------------------------------------------------------------------------------------------------------------------------------|---------------------------------------------|
| African universities                                                                                                                                        | MCC - millennium challenge corporation      |
| BCAS - Bangladesh Centre for advanced studies                                                                                                               | McKinsey                                    |
| Berkeley air monitoring                                                                                                                                     | IIASA (Austria)                             |
| BP                                                                                                                                                          | Measure evaluation                          |
| ceew - India based think tank                                                                                                                               | NBER - national bureau of economic research |
| CGIAR                                                                                                                                                       | Nexleaf analytics                           |
| Check local NGO websites                                                                                                                                    | OECD                                        |
| Clean Cooking Alliance                                                                                                                                      | Practical Action                            |
| Dalberg                                                                                                                                                     | Private sector - publically funded          |
| Deloitte                                                                                                                                                    | Rockefeller foundation                      |
| Development Banks – AsDB, AfDB                                                                                                                              | Rocky Mountain Institute                    |
| Duke University                                                                                                                                             | SEI                                         |
| Energia                                                                                                                                                     | Shell foundation                            |
| ESD - energy for sustainable development - Univ. Cape Town                                                                                                  | SNV                                         |
| FAO                                                                                                                                                         | Solar cookers international                 |
| Faraday Institute - batteries                                                                                                                               | SSRN                                        |
| Gates Foundation                                                                                                                                            | Susana.org - sanitation                     |
| GIZ - energising development                                                                                                                                | Sustainable energy for all (UN)             |
| GLPGP                                                                                                                                                       | Swedish embassy                             |
| Gogla                                                                                                                                                       | TERI - The energy resources institute       |
| GSMA development utilities                                                                                                                                  | UCT                                         |
| HIVOS                                                                                                                                                       | UN Stats                                    |
| <a href="http://kippra.or.ke/">http://kippra.or.ke/</a>                                                                                                     | UN Women                                    |
| <a href="http://www.hedon.info/HomePage">http://www.hedon.info/HomePage</a>                                                                                 | UNDP                                        |
| <a href="https://cdkn.org/organisations/ids-nepal/?loclang=en_gb">https://cdkn.org/organisations/ids-nepal/?loclang=en_gb</a>                               | UNHCR                                       |
| <a href="https://cdkn.org/organisations/panos/?loclang=en_gb">https://cdkn.org/organisations/panos/?loclang=en_gb</a>                                       | University of Michigan - southern africa    |
| <a href="https://lilacs.bvsalud.org/en/">https://lilacs.bvsalud.org/en/</a>                                                                                 | USAID                                       |
| <a href="https://www.3ieimpact.org">https://www.3ieimpact.org</a>                                                                                           | WFP                                         |
| <a href="https://www.africalics.org/">https://www.africalics.org/</a>                                                                                       | <b>Information Networks</b>                 |
| <a href="https://www.ait.ac.th">https://www.ait.ac.th</a>                                                                                                   | - Sustainable energy transitions initiative |
| <a href="https://www.carbontrust.com/tea/news/2019/03/tea-learning-partnership/">https://www.carbontrust.com/tea/news/2019/03/tea-learning-partnership/</a> | - Environment for development initiative    |
| <a href="https://www.pauwes.dz">https://www.pauwes.dz</a>                                                                                                   | - Global energy partnership                 |
| <a href="https://www.tata.com">https://www.tata.com</a>                                                                                                     | - UN climate and clean air coalition        |
| <a href="https://www.teriin.org/">https://www.teriin.org/</a>                                                                                               | - ICRW                                      |
| Initiative for sustainable energy policy                                                                                                                    | - Safe network                              |
| International energy agency                                                                                                                                 | - African academy of sciences               |
| IRENA                                                                                                                                                       | - European academy of sciences              |
|                                                                                                                                                             | - American academy of sciences              |
|                                                                                                                                                             | - Sustainable transitions research network  |

## TEST SET OF PAPERS

1. Dendup, N.; Arimura, T.H. 2019 Information leverage: The adoption of clean cooking fuel in Bhutan. *Energy Policy* 125 <https://doi.org/10.1016/j.enpol.2018.10.054>
2. Dickinson, K.L.; Piedrahita, R.; Coffey, E.R.; Kanyomse, E.; Alirigia, R.; Molnar, T.; Hagar, Y.; Hannigan, M.P.; Oduro, A.R.; Wiedinmyer, C. 2019 Adoption of improved biomass stoves and stove/fuel stacking in the REACCTING intervention study in Northern Ghana. *Energy Policy* 130 <https://doi.org/10.1016/j.enpol.2018.12.007>
3. Evans, W. D.; Johnson, M.; Jagoe, K.; Charron, D.; Young, B. N.; Mashiur Rahman, A. S. M.; Omolloh, D.; Ipe, J. 2018 Evaluation of behavior change communication campaigns to promote modern cookstove purchase and use in lower middle income countries *International Journal of Environmental Research and Public Health* 15 10.3390/ijerph15010011
4. Foley, G.; Floor, W.; Madon, G.; Lawali, E. M.; Montagne, P.; Tounao, K. 1997 The Niger household energy project: promoting rural fuelwood markets and village management of natural woodlands World Bank Technical Paper
5. Garland, C.; Jagoe, K.; Wasirwa, E.; Nguyen, R.; Roth, C.; Patel, A.; Shah, N.; Derby, E.; Mitchell, J.; Pennise, D.; Johnson, M.A., 2015 Impacts of household energy programs on fuel consumption in Benin, Uganda, and India. *Energy for Sustainable Development* 27.
6. Heltberg, R. 2005 Factors determining household fuel choice in Guatemala *Environment and Development Economics* 10
7. Jagger, P.; Jumbe, C. 2016 Stoves or sugar? Willingness to adopt improved cookstoves in Malawi *Energy Policy* 92 <https://doi.org/10.1016/j.enpol.2016.02.034>
8. Jeuland M.; Subhrendu KP.; Jie-Sheng T.S.; Faraz, U. 2019 Preferences and the effectiveness of behavior-change interventions: Evidence from adoption of improved cookstoves in India *Journal of the Association of Environmental and Resource Economists* 0 10.1086/706937
9. Pachauri, S.; Jiang, L. 2008 The household energy transition in India and China *Energy Policy* 36 10.1016/j.enpol.2008.06.016
10. Silva, D.; Nakata, T. 2009 Multi-objective assessment of rural electrification in remote areas with poverty considerations *Energy Policy* 37 <https://doi.org/10.1016/j.enpol.2009.03.060>
